# Supplementary material
Source: PubMed Central journal article supplement (PMC3448795)

## SUPPORTING INFORMATION

### **Thermodynamic and Kinetics Analysis of Peptides Derived from CapZ, NDR, p53, HDM2, and HDM4 Binding to Human S100B**

Lucas N. Wafer, Werner W. Streicher†, Scott A. McCallum, and George I. Makhatadze\*

Center for Biotechnology and Interdisciplinary Studies and Department of Biology, Rensselaer Polytechnic Institute, 110 8<sup>th</sup> Street, Troy, New York 12180, USA.

\*Phone: 518-276-4417      Fax: 518-276-2851      Email: [makhag@rpi.edu](mailto:makhag@rpi.edu)

#### ***Far-UV CD***

Far-UV circular dichroism spectroscopy is a valuable technique to assess the overall secondary structure composition of proteins and peptides. The helical secondary structure is characterized by minima at 222 nm and 208 nm, whereas  $\beta$ -sheets have a minimum around 215 nm (114). Intrinsically disordered proteins and unstructured polypeptides tend to have a featureless spectrum until approximately 210 nm and a minimum just below 200 nm. Far-UV CD spectra of the free peptides were recorded at 25°C to determine the secondary structure content. The helical content of the p53<sup>(367-388)</sup>, TRTK12<sup>(265-276)</sup>, NDR<sup>(62-87)</sup>, and HDM4<sup>(25-47)</sup> peptides are estimated to be 10% or less based on fits of the CD data using the relationships expressed in Equation 5 (Figure S1A, see Methods). Interestingly, the HDM2<sup>(25-47)</sup> peptide is estimated to contain a higher fraction of helical structure than the other peptides, 16%. This is in contrast to the predictions of AGADIR, where the helical content of the p53<sup>(367-388)</sup>, TRTK12<sup>(265-276)</sup>, HDM2<sup>(25-47)</sup>, and HDM4<sup>(25-47)</sup> peptides are estimated to be less than 2%, while the NDR<sup>(62-87)</sup> peptide was predicted to have a 15% helical content (115). However, these results are consistent with previous reports of TRTK12<sup>(265-276)</sup> and p53<sup>(367-388)</sup> being unstructured in solution (34, 116). To determine the ability of the peptides to adopt helical structure, trifluoroethanol (TFE) was added to each peptide to final concentration of 30%. It is well established that TFE promotes alpha helix formation in short peptide sequences (117). In the presence of TFE, all peptides show a significant amount of helical structure (Figure S1B), irrespective of their intrinsic helical propensities. TFE had a greater helix-inducing effect on the HDM2<sup>(25-47)</sup> and HDM4<sup>(25-47)</sup> peptides than on the p53<sup>(367-388)</sup> and TRTK12<sup>(265-276)</sup> peptides, suggesting they may also adopt a partially helical structure upon binding S100B.

**Figure S1.** Far-UV CD spectra for the TRTK12, p53, NDR, HDM2, and HDM4 peptides in both the absence (Panel A) and presence of 30% Trifluorethanol (Panel B). The NDR (spectrum 1), HDM4 (spectrum 2), HDM2 (spectrum 3), TRTK12 (spectrum 4), and p53 (spectrum 5) peptides are able to adopt a secondary helical structure in the presence of TFE.

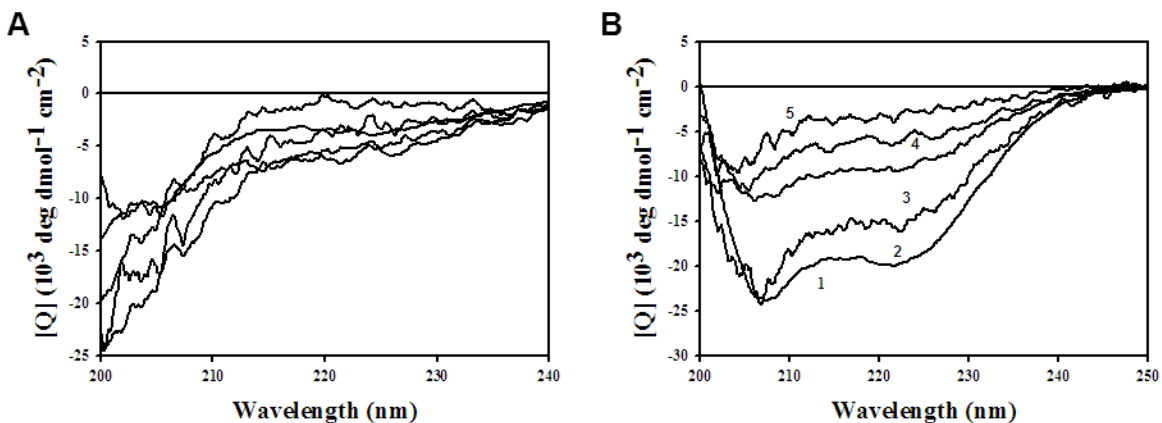

**Figure S2: LineShapeKin Two-Dimensional Global Arrays.** Comparison of the quality of global fits of peptide binding to S100B when the dissociation constant,  $K_d$ , and the kinetic binding constant,  $K_{on}$ , are held constant and varied over several orders of magnitude. The smallest norm corresponds to the best fit. The TRTK12, p52, and NDR peptides were fit to a two identical binding sites model, whereas the HDM2 and HDM4 peptides were fit to single binding site model.

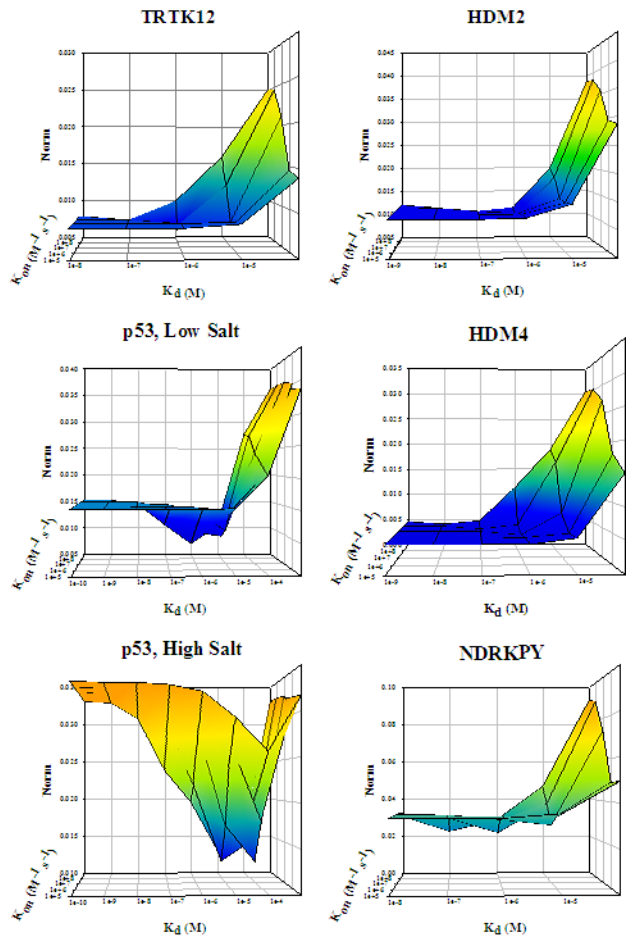

**Figure S3: LineShapeKin Two-Dimensional Individual Arrays.** Select fits from individual residues of S100B from the p53 peptide titration when the dissociation constant,  $K_d$ , and the kinetic binding constant,  $K_{on}$ , are held constant and varied over several orders of magnitude. The smallest norm corresponds to the best fit. Individual fits correlate well with each other and the global fit.

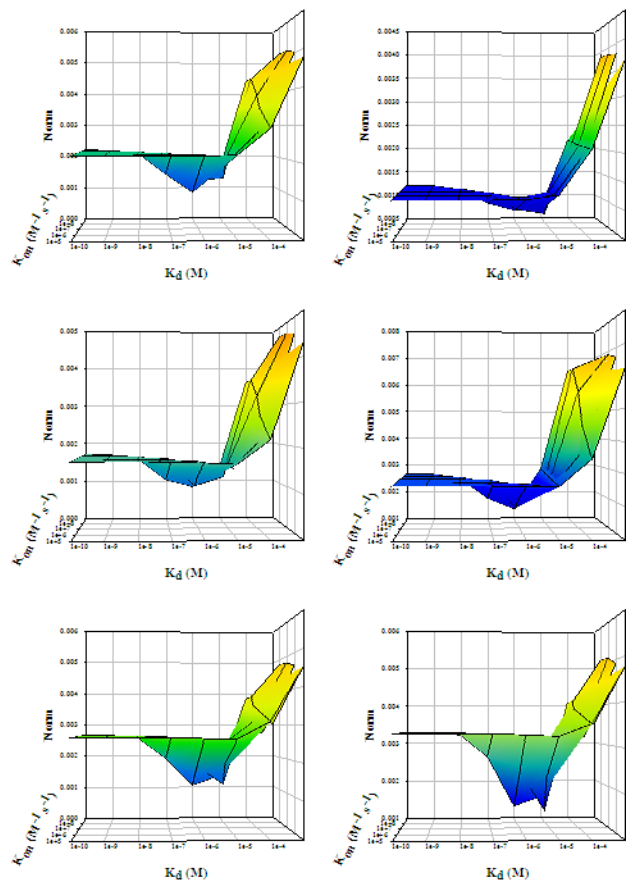

Supplement: NIHMS404415-supplement-1_si_001.pdf [file NIHMS404415-supplement-1_si_001.pdf]
